# Supplementary material for: In Vitro Inhibition of Phosphodiesterase 3B (PDE 3B) by Anthocyanin-Rich Fruit Juice Extracts and Selected Anthocyanins
Source: PubMed Central journal article supplement (PMC7555035; doi:10.3390/ijms21186934), 2020-09-21
Supplement: ijms-21-06934-s001.pdf [file ijms-21-06934-s001.pdf]

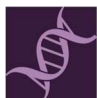

## HPLC-DAD chromatograms and isocontour plots for each juice type and complete list of the anthocyanins and copigments detected

### Chokeberry

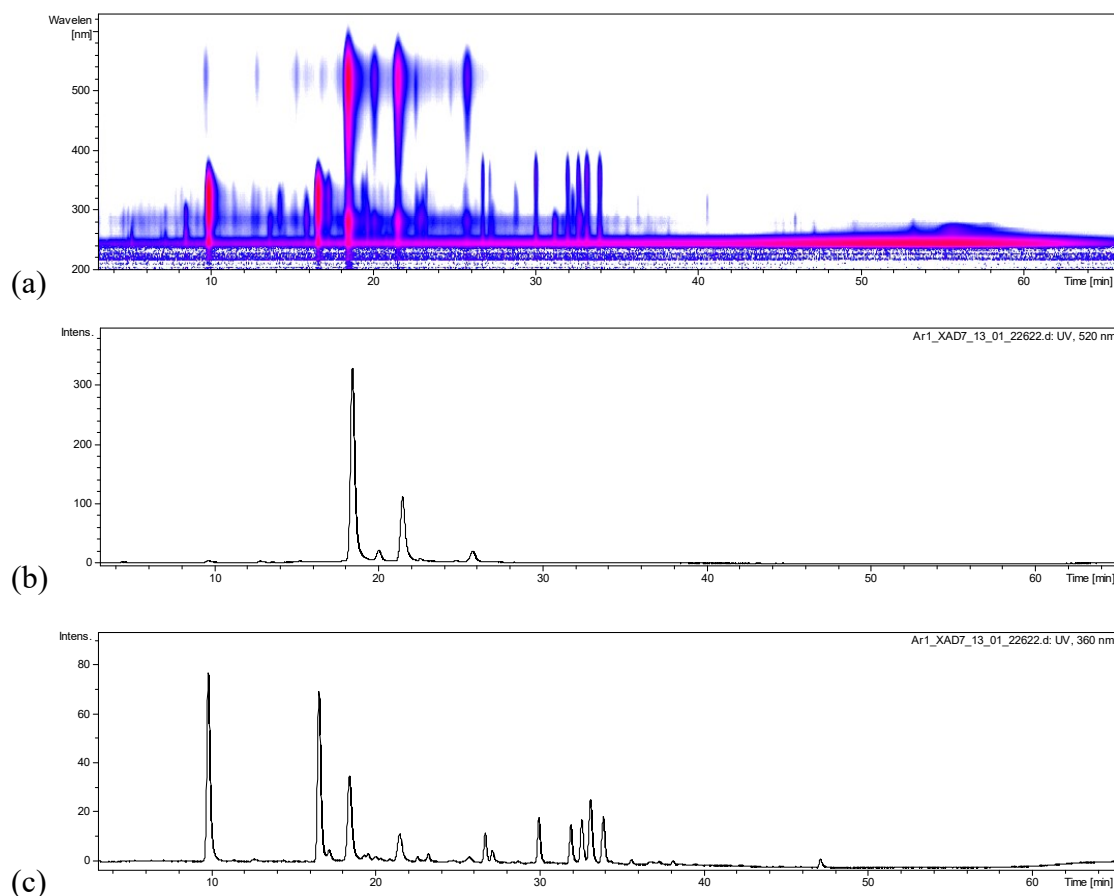

**Figure S1.** Isocontour plot from  $\lambda$  200 to 600 (a) and DAD chromatograms at a wavelength of  $\lambda$  520 (b) and  $\lambda$  360 (c) of the high-performance liquid chromatography electrospray ionization mass spectrometry (HPLC-ESI-MS/MS) chromatograms of the XAD 7 extract of CkB1. Peak identification is given in Tables 1 and 2.

**Table S1.** HPLC-ESI-MS/MS data of the XAD 7 extract of CkB1, identified anthocyanins and their absorption maxima  $\lambda_{\max}$ .

| Peak No. | Retention time (min) | [M-H] <sup>-</sup> m/z | Fragments m/z | $\lambda_{\max}$ | Anthocyanin            | Identification |
|----------|----------------------|------------------------|---------------|------------------|------------------------|----------------|
| 1        | 9,9                  | 737                    | 575, 287      | 522              | Cyanidin-derivative    | C              |
| 2        | 12,9                 | 707                    | 575, 287      | 523              | Cyanidin-derivative    | C              |
| 3        | 18,4                 | 449                    | 287           | 515              | Cyandin-3-galactoside  | A              |
| 4        | 20,0                 | 449                    | 287           | 515              | Cyanidin-3-glucoside   | A              |
| 5        | 21,5                 | 419                    | 287           | 515              | Cyanidin-3-arabinoside | A              |
| 6        | 25,8                 | 419                    | 287           | 517              | Cyanidin-3-xyloside    | B              |

Compounds were identified by (A) mass spectral data and comparison with authentic reference, (B) mass spectral data and literature data or (C) mass data only.

**Table S2.** HPLC-ESI-MS/MS data of the XAD 7 extract of CkB1, identified copigments and their absorption maxima  $\lambda_{\max}$ .

| Peak No. | Retention time (min) | [M-H] <sup>-</sup> m/z | Fragments m/z | $\lambda_{\max}$ | Copigment                 | Identification |
|----------|----------------------|------------------------|---------------|------------------|---------------------------|----------------|
| 1        | 10,0                 | 353                    | 191,179,135   | 323              | Neochlorogenic acid       | A              |
| 2        | 16,6                 | 353                    | 191, 179, 161 | 324              | Chlorogenic acid          | A              |
| 3        | 17,2                 | 353                    | 191           | 324              | Cryptochlorogenic acid    | A              |
| 4        | 26,8                 | 625                    | 301           | 351              | Quercetin-dihexoside      | C              |
| 5        | 27,2                 | 625                    | 301           | 349              | Quercetin-dihexoside      | C              |
| 6        | 29,9                 | 595                    | 301           | 352              | Quercetin-3-vicianoside   | B              |
| 7        | 32,0                 | 609                    | 301           | 351              | Quercetin-3-robinobioside | B              |
| 8        | 32,6                 | 609                    | 301           | 349              | Quercetin-3-rutinoside    | A              |
| 9        | 33,2                 | 463                    | 301           | 352              | Quercetin-3-galactoside   | B              |
| 10       | 33,9                 | 463                    | 301           | 352              | Quercetin-3-glucoside     | A              |

Compounds were identified by (A) mass spectral data and comparison with authentic reference, (B) mass spectral data and literature data or (C) mass data only.

### Cranberry

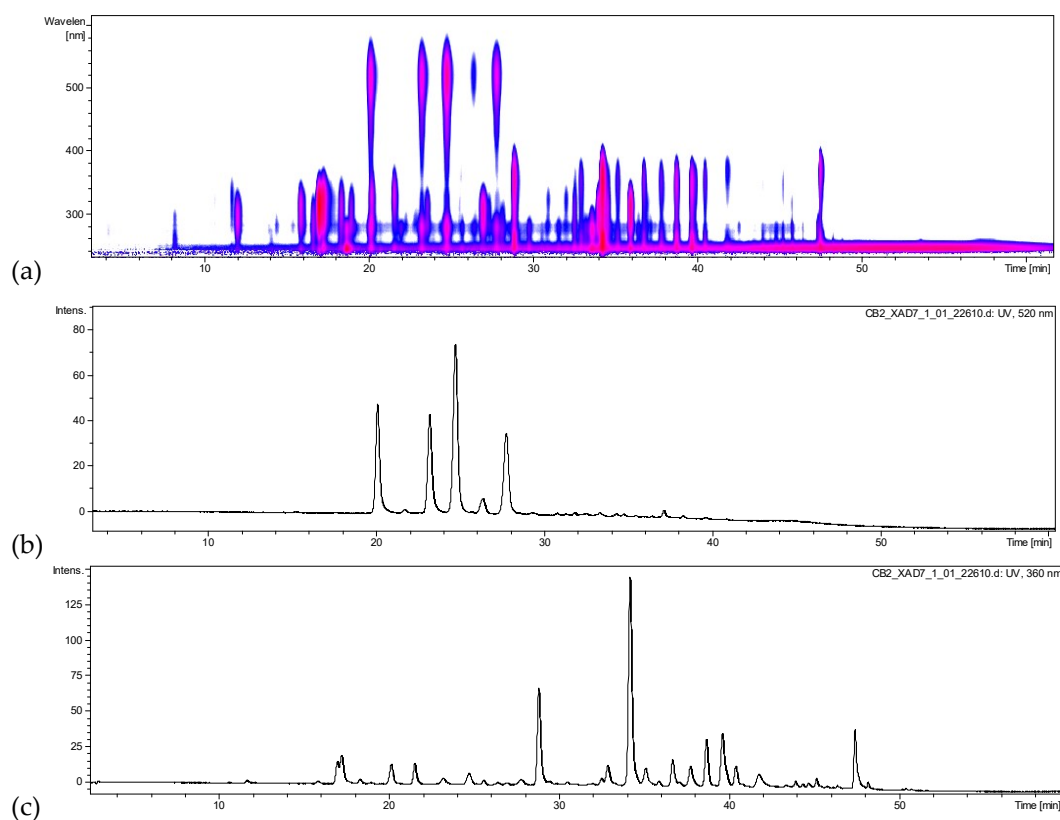

**Figure S2.** Isocontour plot from  $\lambda$  200 to 600 (a) and DAD chromatograms at a wavelength of  $\lambda$  520 (b) and  $\lambda$  360 (c) of the high-performance liquid chromatography electrospray ionization mass spectrometry (HPLC-ESI-MS/MS) chromatograms of the XAD 7 extract of CB2. Peak identification is given in Tables 3 and 4.

**Table S3.** HPLC-ESI-MS/MS data of the XAD 7 extract of CB2, identified anthocyanins and their absorption maxima  $\lambda_{\max}$ .

| Peak No. | Retention time (min) | [M+H] <sup>+</sup> m/z | Fragments m/z | $\lambda_{\max}$ | Anthocyanin            | Identification |
|----------|----------------------|------------------------|---------------|------------------|------------------------|----------------|
| 1        | 20,2                 | 449                    | 287           | 515              | Cyanidin-3-galactoside | A              |
| 2        | 21,9                 | 449                    | 287           | 524              | Cyanidin-3-glucoside   | A              |
| 3        | 23,3                 | 419                    | 287           | 516              | Cyanidin-3-arabinoside | A              |
| 4        | 24,8                 | 463                    | 301           | 516              | Peonidin-3-galactoside | B              |
| 5        | 26,5                 | 463                    | 301           | 520              | Peonidin-3-glucoside   | A              |
| 6        | 27,8                 | 433                    | 301           | 516              | Peonidin-3-arabinoside | B              |
| 7        | 29,5                 | 463                    | 331           | 528              | Malvidin-3-arabinoside | B              |

Compounds were identified by (A) mass spectral data and comparison with authentic reference, (B) mass spectral data and literature data or (C) mass data only.

**Table S4.** HPLC-ESI-MS/MS data of the XAD 7 extract of CB2, identified copigments and their absorption maxima  $\lambda_{\max}$ .

| Peak No. | Retention time (min) | [M-H] <sup>-</sup> m/z | Fragments m/z | $\lambda_{\max}$ | Copigment                    | Identification |
|----------|----------------------|------------------------|---------------|------------------|------------------------------|----------------|
| 1        | 15,9                 | 341                    | 179, 135      | 313              | Caffeic acid hexoside        | B              |
| 2        | 17,0                 | 325                    | 163           | 315              | Coumaric acid hexosid        | B              |
| 3        | 17,3                 | 325                    | 145           | 322              | Coumaric acid hexosid        | B              |
| 4        | 17,5                 | 353                    | 191           | 322              | Chlorogenic acid             | A              |
| 5        | 18,6                 | 355                    | 193           | 328              | Ferulic acid                 | A              |
| 6        | 19,2                 | 577                    | 407           | 308              | Proanthocyanidin dimer       | B              |
| 7        | 19,8                 | 385                    | 223           | 294              | Sinapic acid hexosde         | B              |
| 8        | 22,5                 | 335                    | 179           | 325              | caffeoylshikimic acid        | B              |
| 9        | 23,0                 | 337                    | 191           | 312              | Coumaroylquinic acid         | B              |
| 10       | 24,0                 | 863                    | 711           | 310              | Proanthocyanidin trimer      | B              |
| 11       | 28,9                 | 479                    | 316           | 354              | Myricetin-hexoside           | B              |
| 12       | 29,3                 | 449                    | 316           | 354              | Myricetin-xyloside           | B              |
| 13       | 30,8                 | 493                    | 330           | 357              | Laricitrin-hexoside          | B              |
| 14       | 32,0                 | 535                    | 371           | 351              | Coumaroyl Iridoid hexoside   | B              |
| 15       | 32,8                 | 537                    | 373           | 311              | Coumaroyl-dihydromonotropein | B              |
| 16       | 34,2                 | 463                    | 301           | 352              | Quercetin-hexoside           | B              |
| 17       | 35,1                 | 463                    | 301           | 355              | Quercetin-hexoside           | B              |
| 18       | 36,7                 | 433                    | 301           | 351              | Quercetin-pentoside          | B              |
| 19       | 37,8                 | 433                    | 301           | 350              | Quercetin-pentoside          | B              |
| 20       | 38,7                 | 433                    | 301           | 351              | Quercetin-pentoside          | B              |
| 21       | 39,6                 | 447                    | 301           | 346              | Quercetin-rhamnoside         | B              |
| 22       | 40,4                 | 507                    | 344           | 352              | Syringetin-hexoside          | B              |
| 23       | 41,8                 | 317                    | 179           | 368              | Myricetin                    | A              |

|    |      |     |     |     |                        |   |
|----|------|-----|-----|-----|------------------------|---|
| 24 | 42,3 | 447 | 314 | 355 | Isorhamnetin-pentoside | B |
| 25 | 43,0 | 477 | 344 | 351 | Syringetin-pentoside   | B |
| 26 | 47,4 | 301 | 179 | 368 | Quercetin              | A |

Compounds were identified by (A) mass spectral data and comparison with authentic reference, (B) mass spectral data and literature data or (C) mass data only.

### Pomegranate

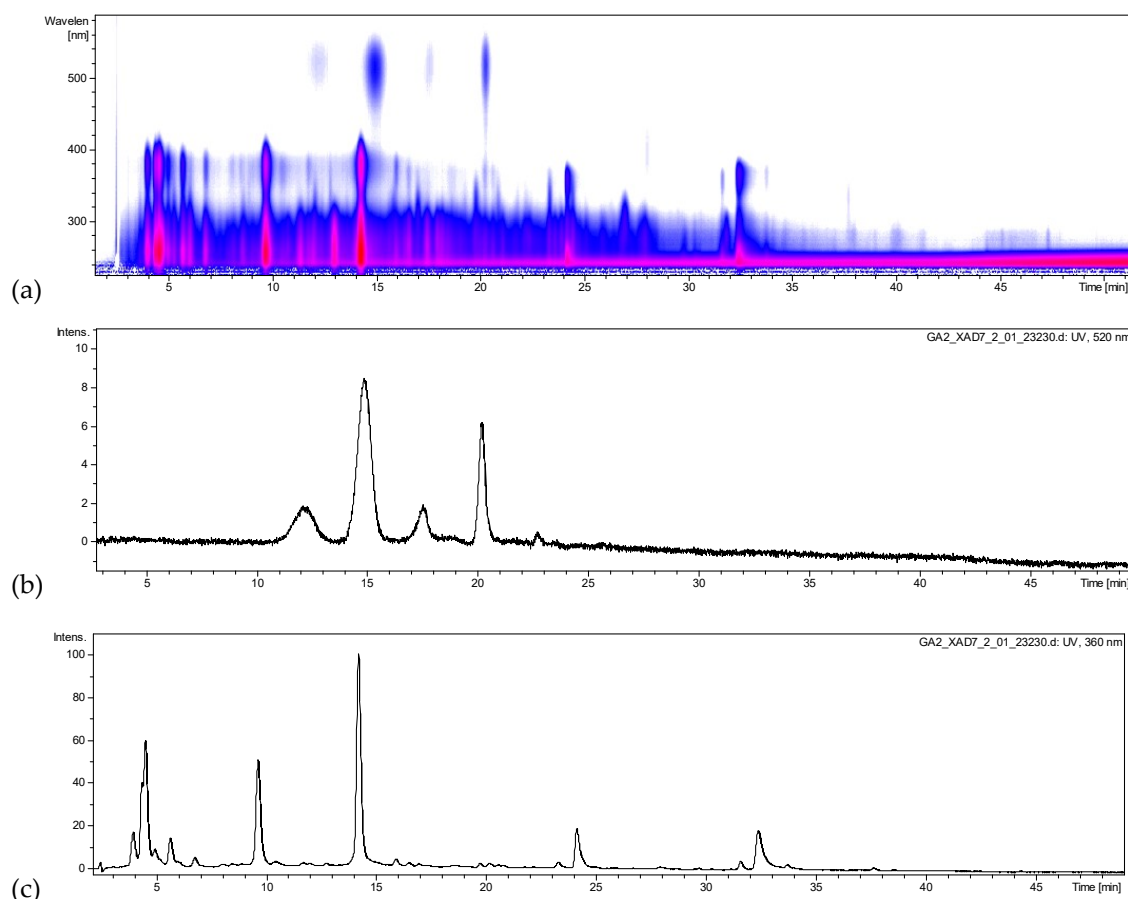

**Figure S3.** Isocontour plot from  $\lambda$  200 to 600 (a) and DAD chromatograms at a wavelength of  $\lambda$  520 (b) and  $\lambda$  360 (c) of the high-performance liquid chromatography electrospray ionization mass spectrometry (HPLC-ESI-MS/MS) chromatograms of the XAD 7 extract of PG2. Peak identification is given in Tables 5 and 6.

**Table S5.** HPLC-ESI-MS/MS data of the XAD 7 extract of PG2, identified anthocyanins and their absorption maxima  $\lambda_{\max}$ .

| Peak No. | Retention time (min) | [M+H] <sup>+</sup> m/z | Fragments m/z | $\lambda_{\max}$ | Anthocyanin                 | Identification |
|----------|----------------------|------------------------|---------------|------------------|-----------------------------|----------------|
| 1        | 12,1                 | 627                    | 303           | 523              | Delphinidin-3,5-diglucoside | B              |
| 2        | 14,9                 | 611                    | 287           | 514              | Cyanidin-3,5-diglucoside    | A              |
| 3        | 17,4                 | 595                    | 271           | 514              | Delphinidin-3-glucoside     | A              |
| 4        | 20,3                 | 449                    | 287           | 517              | Cyanidin-3-glucoside        | A              |

Compounds were identified by (A) mass spectral data and comparison with authentic reference, (B) mass spectral data and literature data or (C) mass data only.

**Table S6.** HPLC-ESI-MS/MS data of the XAD 7 extract of PG2, identified copigments and their absorption maxima  $\lambda_{\max}$ .

| Peak No. | Retention time (min) | [M-H] <sup>-</sup> m/z | Fragments m/z | $\lambda_{\max}$ | Copigment                      | Identification |
|----------|----------------------|------------------------|---------------|------------------|--------------------------------|----------------|
| 1        | 3,4                  | 783                    | 721,601       | 377              | Pedunculagin I                 | B              |
| 2        | 3,7                  | 1101                   | 781, 601      | 377              | Punicalin-derivative           | C              |
| 3        | 308                  | 649                    | 605, 301      |                  | Trisgalloyl-glucoside          | B              |
| 4        | 3,9                  | 781                    | 601,271       | 378              | Punicalin I                    | A              |
| 5        | 4,4                  | 781                    | 601,299       | 377              | Punicalin II                   | A              |
| 6        | 4,8                  | 1083                   | 601           |                  | Punicalagin I                  | A              |
| 7        | 5,4                  | 783                    | 299,601       | 376              | Pedunculagin II                | B              |
| 8        | 7,9                  | 783                    | 301           | 377              | Pedunculagin III               | B              |
| 9        | 9,5                  | 933                    | 451           | 372              | Galloyl-O-punicalin            | B              |
| 10       | 10,9                 | 469                    | 425           | 371              | Valonic acid bilactone         | B              |
| 11       | 11,4                 | 951                    | 907           | 373              | Granatin B                     | B              |
| 12       | 12,5                 | 951                    | 783           | 377              | HHDP-valoneoyl-glucoside       | B              |
| 13       | 13,3                 | 1083                   | 601           | 378              | Punicalagin II                 | A              |
| 14       | 15,4                 | 799                    | 301           | 376              | Ellagic acid derivative        | C              |
| 15       | 15,8                 | 1085                   | 451           | 375              | Digalloyl-gallagyl-hexoside    | B              |
| 16       | 16,2                 | 799                    | 301           | 375              | Granatin A                     | B              |
| 17       | 17,6                 | 325                    | 145           | 312              | Coumaric acid hexoside         | B              |
| 18       | 18,8                 | 801                    | 347           | 365              | Digalloyl-HHDP-glucuronide     | B              |
| 19       | 20,0                 | 449                    | 287           | 322              | Dihydrokaempferol-hexoside     | B              |
| 20       | 20,1                 | 355                    | 193           | 327              | Ferulic acid hexoside          | B              |
| 21       | 21,4                 | 633                    | 301           | 370              | Galloyl-HHDP-glucoside         | B              |
| 22       | 23,0                 | 635                    | 465           | 322              | Tri-O-galloyl-glucoside        | B              |
| 23       | 24,9                 | 463                    | 301           | 360              | Ellagic acid hexoside          | B              |
| 24       | 26,1                 | 953                    | 301           | 332              | Galloyl-bis-HDDP-glucoside     | B              |
| 25       | 29,5                 | 447                    | 301           | 360              | Quercetin-3-rhamnoside         | B              |
| 26       | 30,1                 | 787                    | 635           | 320              | Tetra-O-galloyl-glucoside      | B              |
| 27       | 32,3                 | 491                    | 328           | 369              | Dimethyl ellagic acid hexoside | B              |
| 28       | 33,0                 | 301                    | 229           | 366              | Ellagic acid                   | A              |

Compounds were identified by (A) mass spectral data and comparison with authentic reference, (B) mass spectral data and literature data or (C) mass data only.

### Blueberry

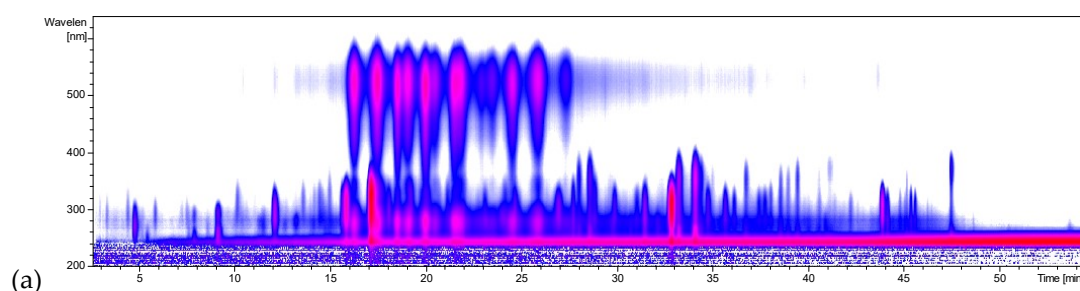

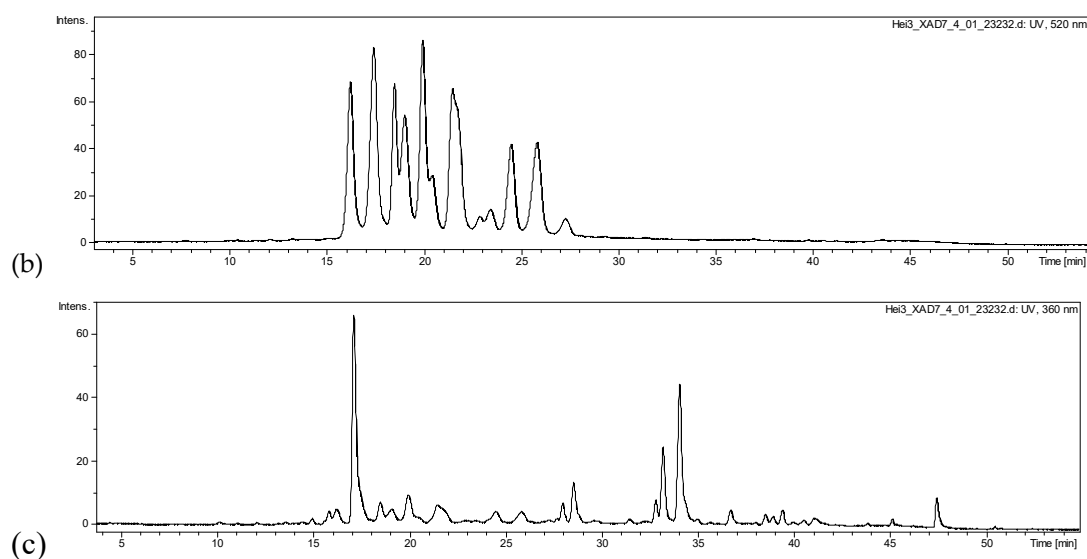

**Figure S4.** Isocontour plot from  $\lambda$  200 to 600 (a) and DAD chromatograms at a wavelength of  $\lambda$  520 (b) and  $\lambda$  360 (c) of the high-performance liquid chromatography electrospray ionization mass spectrometry (HPLC-ESI-MS/MS) chromatograms of the XAD 7 extract of BB2. Peak identification is given in Tables 7 and 8.

**Table S7.** HPLC-ESI-MS/MS data of the XAD 7 extract of BB2, identified anthocyanins and their absorption maxima  $\lambda_{\max}$ .

| Peak No. | Retention time (min) | [M+H] <sup>+</sup> m/z | Fragments m/z | $\lambda_{\max}$ | Anthocyanin               | Identification |
|----------|----------------------|------------------------|---------------|------------------|---------------------------|----------------|
| 1        | 16,3                 | 465                    | 303           | 522              | Delphinidin-3-galactoside | B              |
| 2        | 17,4                 | 465                    | 303           | 522              | Delphinidin-3-glucoside   | A              |
| 3        | 18,6                 | 449                    | 287           | 515              | Cyanidin-3-galactoside    | A              |
| 4        | 19,1                 | 435                    | 303           | 523              | Delphinidin-3-arabinoside | B              |
| 5        | 20,0                 | 449                    | 287           | 515              | Cyanidin-3-glucoside      | A              |
| 6        | 20,6                 | 479                    | 317           | 522              | Petunidin-3-galactoside   | B              |
| 7        | 21,4                 | 419                    | 287           | 517              | Cyanidin-3-arabinoside    | A              |
| 8        | 21,9                 | 479                    | 317           | 523              | Petunidin-3-glucoside     | A              |
| 9        | 22,9                 | 463                    | 301           | 519              | Peonidin-3-galactoside    | B              |
| 10       | 23,5                 | 449                    | 317           | 524              | Petunidin-3-arabinoside   | B              |
| 11       | 24,4                 | 493                    | 331           | 519              | Malvidin-3-galactoside    | B              |
| 12       | 24,5                 | 463                    | 301           | 518              | Peonidin-3-glucoside      | A              |
| 13       | 25,8                 | 493                    | 331           | 524              | Malvidin-3-glucoside      | A              |
| 14       | 27,2                 | 463                    | 331           | 526              | Malvidin-3-arabinoside    | B              |

Compounds were identified by (A) mass spectral data and comparison with authentic reference, (B) mass spectral data and literature data or (C) mass data only.

**Table S8.** HPLC-ESI-MS/MS data of the XAD 7 extract of BB2, identified copigments and their absorption maxima  $\lambda_{\max}$ .

| Peak No. | Retention time (min) | [M-H] <sup>-</sup> m/z | Fragments m/z | $\lambda_{\max}$ | Copigment                      | Identification |
|----------|----------------------|------------------------|---------------|------------------|--------------------------------|----------------|
| 1        | 15,9                 | 341                    | 179           | 312              | Caffeic acid hexoside          | B              |
| 2        | 17,2                 | 353                    | 191           | 324              | Chlorogenic acid               | A              |
| 3        | 19,2                 | 447                    | 284           | 322              | Kaempferol-hexoside            | B              |
| 4        | 28,1                 | 479                    | 316           | 343              | Myricetin-hexoside             | B              |
| 5        | 28,5                 | 479                    | 316           | 348              | Myricetin-hexoside             | B              |
| 6        | 31,5                 | 535                    | 371           | 311              | Coumaroyl Iridoid hexoside     | B              |
| 7        | 32,4                 | 463                    | 301           | 348              | Quercetin-hexoside             | B              |
| 8        | 32,7                 | 609                    | 301           | 311              | Quercetin-rutinoside           | A              |
| 9        | 33,1                 | 535                    | 371           | 311              | Coumaroyl Iridoid hexoside     | B              |
| 10       | 34,0                 | 463                    | 301           | 352              | Quercetin-hexoside             | B              |
| 11       | 34,2                 | 477                    | 301           | 352              | Quercetin-glucuronide          | B              |
| 12       | 36,9                 | 433                    | 300,301       | 351              | Quercetin-pentoside            | B              |
| 13       | 38,1                 | 411                    | 145           | -                | Cuomarcic acid derivative      | B              |
| 14       | 38,7                 | 447                    | 300,301       | 343              | Quercetin-desoxyhexoside       | B              |
| 15       | 39,5                 | 507                    | 344           | 343              | Syringetin-hexoside            | B              |
| 16       | 45,2                 | 591                    | 447           | 306              | Quercetin-3-(4-HMG)-rhamnoside | B              |
| 17       | 47,5                 | 301                    | 151           | 369              | Quercetin                      | A              |

Compounds were identified by (A) mass spectral data and comparison with authentic reference, (B) mass spectral data and literature data or (C) mass data only. HMG = 3-hydroxy-3-methylglutaroyl.

### Elderberry

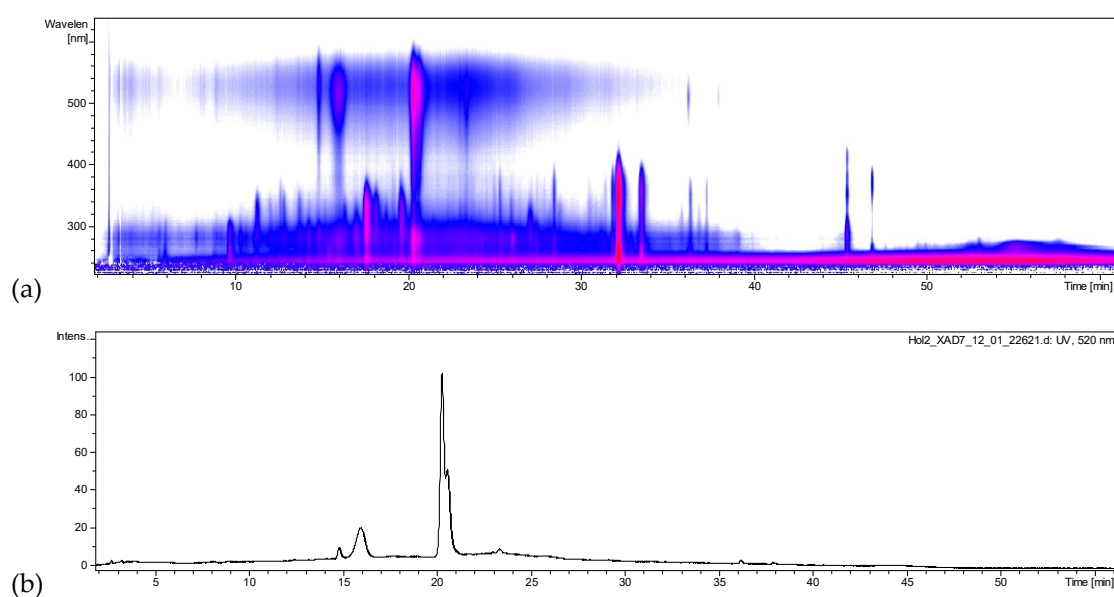

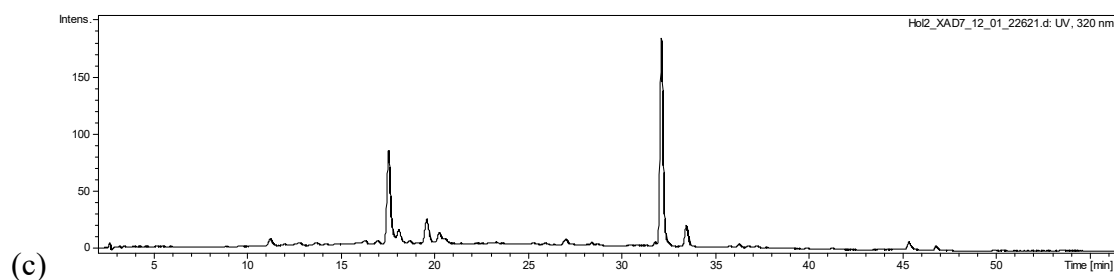

**Figure S5.** Isocontour plot from  $\lambda$  200 to 600 (a) and DAD chromatograms at a wavelength of  $\lambda$  520 (b) and  $\lambda$  320 (c) of the high-performance liquid chromatography electrospray ionization mass spectrometry (HPLC-ESI-MS/MS) chromatograms of the XAD 7 extract of EB1. Peak identification is given in Tables 9 and 10.

**Table S9.** HPLC-ESI-MS/MS data of the XAD 7 extract of EB1, identified anthocyanins and their absorption maxima  $\lambda_{\max}$ .

| Peak No. | Retention time (min) | [M+H] <sup>+</sup> m/z | Fragments m/z | $\lambda_{\max}$ | Anthocyanin                         | Identification |
|----------|----------------------|------------------------|---------------|------------------|-------------------------------------|----------------|
| 1        | 14,9                 | 611                    | 287           | 526              | Cyanidin-dihexoside                 | B              |
| 2        | 16,0                 | 743                    | 287           | 514              | Cyanidin-3-sambubioside-5-glucoside | B              |
| 3        | 20,4                 | 581                    | 287           | 516              | Cyanidin-3-sambubioside             | B              |
| 4        | 20,8                 | 449                    | 287           | 516              | Cyanidin-3-glucoside                | A              |

Compounds were identified by (A) mass spectral data and comparison with authentic reference, (B) mass spectral data and literature data or (C) mass data only.

**Table S10.** HPLC-ESI-MS/MS data of the XAD 7 extract of EB1, identified copigments and their absorption maxima  $\lambda_{\max}$ .

| Peak No. | Retention time (min) | [M-H] <sup>-</sup> m/z | Fragments m/z | $\lambda_{\max}$ | Copigment               | Identification |
|----------|----------------------|------------------------|---------------|------------------|-------------------------|----------------|
| 1        | 10,9                 | 353                    | 191           | 280, 320         | Neochlorogenic acid     | A              |
| 2        | 17,1                 | 353 (707)              | 191           | 324              | Chlorogenic acid        | A              |
| 3        | 17,9                 | 353                    | 191           | 284, 319         | Cryptochlorogenic acid  | A              |
| 4        | 19,2                 | 625                    | 417, 463→301  | 285, 319         | Quercetin-dihexoside    | B              |
| 5        | 19,6                 | 771                    | 609→301       | -                | Quercetin-derivative    | C              |
| 6        | 32,3                 | 609                    | 301           | 265, 352         | Quercetin-3-rutinoside  | A              |
| 7        | 33,7                 | 463                    | 301           | 255, 352         | Quercetin-3-glucoside   | A              |
| 8        | 36,5                 | 593                    | 285           | 265, 325         | Kaempferol-3-rutinoside | B              |
| 9        | 37,4                 | 623                    | 315           | 338              | Isorhamnetin-rutinoside | B              |
| 10       | 47,0                 | 301                    | 151           | 368              | Quercetin               | A              |

Compounds were identified by (A) mass spectral data and comparison with authentic reference, (B) mass spectral data and literature data or (C) mass data only.



## Red Grape

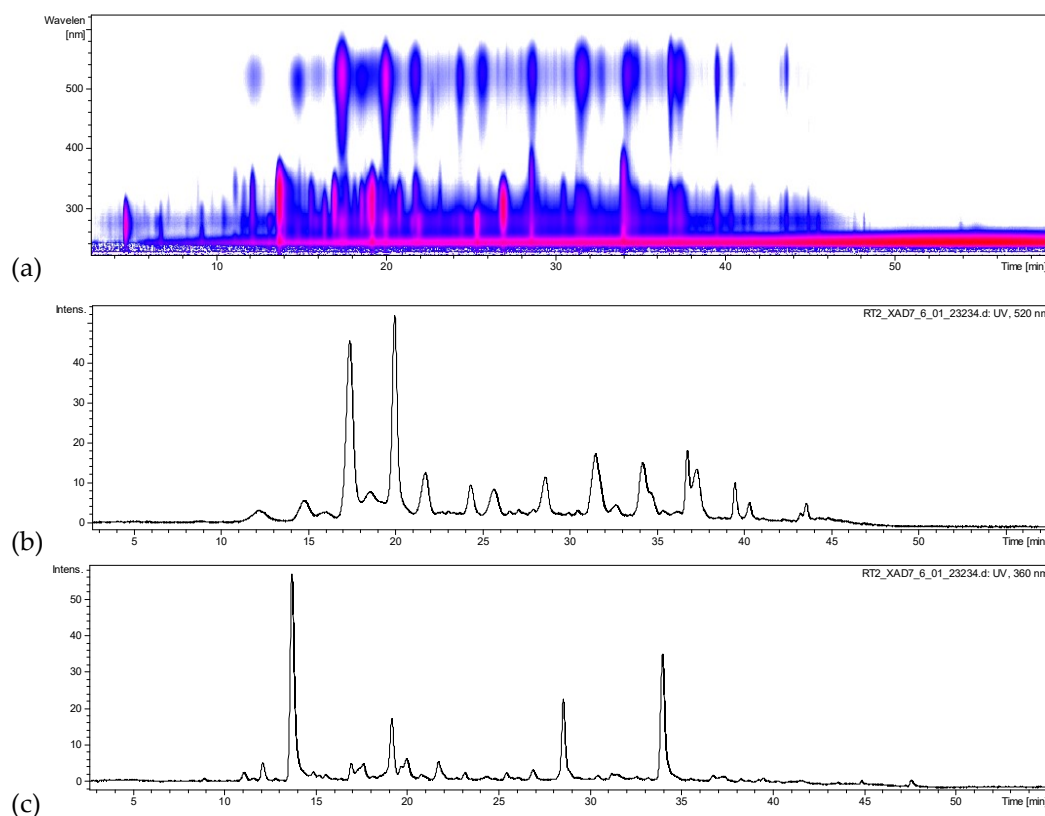

**Figure S6.** Isocontour plot from  $\lambda$  200 to 600 (a) and DAD chromatograms at a wavelength of  $\lambda$  520 (b) and  $\lambda$  360 (c) of the high-performance liquid chromatography electrospray ionization mass spectrometry (HPLC-ESI-MS/MS) chromatograms of the XAD 7 extract of RG2. Peak identification is given in Tables 11 and 12.

**Table S11.** HPLC-ESI-MS/MS data of the XAD 7 extract of RG2, identified anthocyanins and their absorption maxima  $\lambda_{\max}$ .

| Peak No. | Retention Time (min) | [M+H] <sup>+</sup> m/z | Fragments m/z | $\lambda_{\max}$ | Anthocyanin                                 | Identification |
|----------|----------------------|------------------------|---------------|------------------|---------------------------------------------|----------------|
| 1        | 12,4                 | 627                    | 303           | 518              | Delphinidin-dihexoside                      | C              |
| 2        | 14,9                 | 611                    | 287           | 514              | Cyanidin-dihexoside                         | C              |
| 3        | 16,0                 | 641                    | 317           | 519              | Petunidin-dihexoside                        | C              |
| 4        | 17,4                 | 465                    | 303           | 522              | Delphinidin-3-glucoside                     | A              |
| 5        | 18,6                 | 625                    | 301           | 515              | Peonidin-dihexoside                         | C              |
| 6        | 20,0                 | 449                    | 287           | 515              | Cyanidin-3-glucoside                        | A              |
| 7        | 21,7                 | 479                    | 317           | 523              | Petunidin-3-glucoside                       | A              |
| 8        | 24,4                 | 463                    | 301           | 517              | Peonidin-3-glucoside                        | A              |
| 9        | 25,8                 | 493                    | 331           | 525              | Malvidin-3-glucoside                        | A              |
| 10       | 28,7                 | 507                    | 303           | 525              | Delphinidin-3-(6''-acetyl)glucoside         | B              |
| 11       | 31,3                 | 491                    | 287           | 523              | Cyanidin-3-(6''-acetyl)glucoside            | B              |
| 12       | 32,0                 | 773                    | 303           | 527              | Delphinidin-3-(6''-coumaroyl)-5-diglucoside | B              |

|    |      |     |          |     |                                           |   |
|----|------|-----|----------|-----|-------------------------------------------|---|
| 13 | 32,6 | 521 | 317      | 523 | Petunidin-3-(6''-acetyl)hexoside          | B |
| 14 | 34,2 | 757 | 595, 287 | 522 | Cyanidin-3-(6''-coumaroyl)-5-diglucoside  | B |
| 15 | 34,8 | 787 | 317, 625 | 530 | Petunidin-3-(6''-coumaroyl)-5-diglucoside | B |
| 16 | 36,8 | 611 | 303      | 527 | Delphinidin-3-(6''-coumaroyl)hexoside     | B |
| 17 | 37,3 | 801 | 331, 639 | 525 | Malvidin-3-(coumaroyl)-5-diglucoside      | B |
| 18 | 39,6 | 595 | 287      | 522 | Cyanidin-3-(6''-coumaroyl)glucoside       | B |
| 19 | 40,4 | 625 | 317      | 530 | Petunidin-3-(6''-coumaroyl)glucoside      | B |
| 20 | 43,4 | 609 | 301      | 530 | Peonidin-3-(6''-coumaroyl)hexoside        | B |
| 21 | 43,6 | 639 | 331      | 530 | Malvidin-3-(6''-coumaroyl)hexoside        | B |

Compounds were identified by (A) mass spectral data and comparison with authentic reference, (B) mass spectral data and literature data or (C) mass data only.

**Table S12.** HPLC-ESI-MS/MS data of the XAD 7 extract of RG2, identified anthocyanins and their absorption maxima  $\lambda_{\max}$ .

| Peak No. | Retention Time (min) | [M-H] <sup>-</sup> m/z | Fragments m/z | $\lambda_{\max}$ | Copigment              | Identification |
|----------|----------------------|------------------------|---------------|------------------|------------------------|----------------|
| 1        | 5,1                  | 169                    | 125           | -                | Gallic acid            | A              |
| 2        | 13,8                 | 577                    | 407           | 327              | Proanthocyanidin dimer | B              |
| 3        | 17,1                 | 325                    | 145           | 314              | Coumaric acid hexoside | B              |
| 4        | 19,2                 | 295                    | 163           | 313              | Coumaric acid          | B              |
| 5        | 19,8                 | 577                    | 407           | 315              | Proanthocyanidin dimer | B              |
| 6        | 27,0                 | 163                    | 119           | 309              | Coumaric acid          | A              |
| 7        | 28,4                 | 479                    | 316,317       | 352              | Isorhamnetin-hexoside  | B              |
| 8        | 33,8                 | 463                    | 301           | 351              | Quercetin-hexoside     | B              |
| 9        | 34,1                 | 477                    | 301           | 314              | Quercetin-glucuronide  | B              |

Compounds were identified by (A) mass spectral data and comparison with authentic reference, (B) mass spectral data and literature data or (C) mass data only.

### Sour Cherry

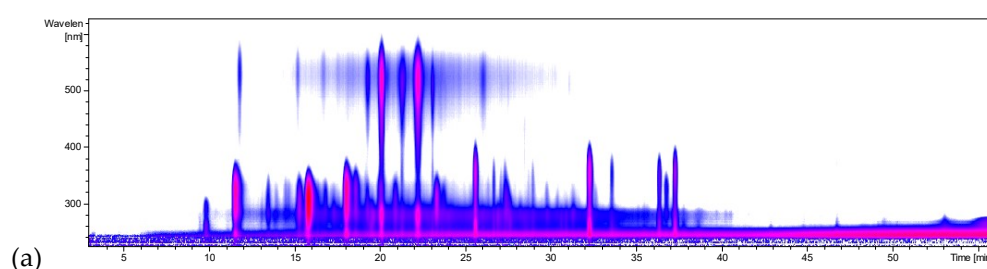

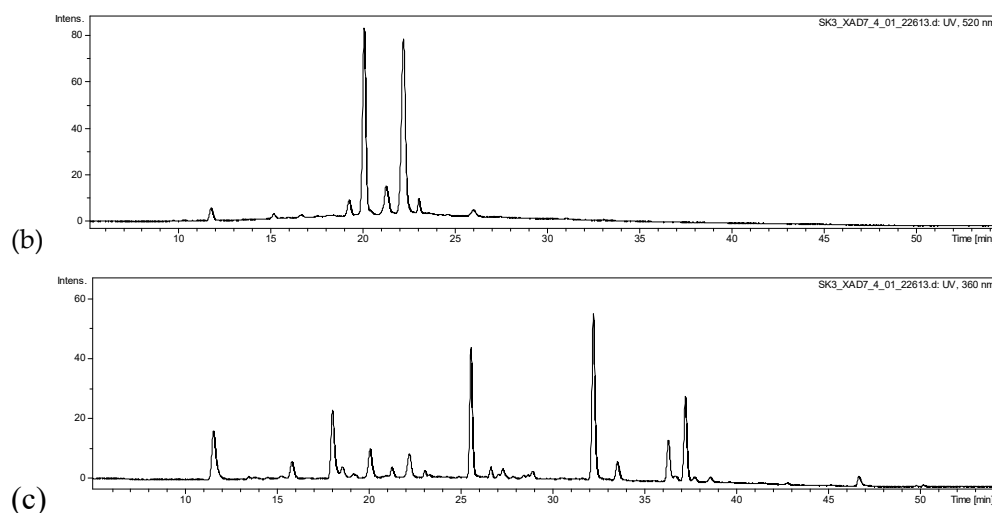

**Figure S7.** Isocontour plot from  $\lambda$  200 to 600 (a) and DAD chromatograms at a wavelength of  $\lambda$  520 (b) and  $\lambda$  360 (c) of the high-performance liquid chromatography electrospray ionization mass spectrometry (HPLC-ESI-MS/MS) chromatograms of the XAD 7 extract of SC1. Peak identification is given in Table 13 and 14.

**Table S13.** HPLC-ESI-MS/MS data of the XAD 7 extract of SC1, identified anthocyanins and their absorption maxima  $\lambda_{\max}$ .

| Peak No. | Retention Time (min) | [M+H] <sup>+</sup> m/z | Fragments m/z | $\lambda_{\max}$ | Anthocyanin                                     | Identification |
|----------|----------------------|------------------------|---------------|------------------|-------------------------------------------------|----------------|
| 1        | 19,3                 | 611                    | 287           | 519              | Cyanidin-3-sophoroside                          | B              |
| 2        | 20,1                 | 757                    | 287           | 517              | Cyanidin-3-(2 <sup>G</sup> -glucosylrutinoside) | B              |
| 3        | 21,6                 | 727                    | 287           | 522              | Cyanidin-3-(2 <sup>G</sup> -xylosylrutinoside)  | B              |
| 4        | 22,3                 | 595                    | 287           | 517              | Cyanidin-3-rutinoside                           | B              |

Compounds were identified by (A) mass spectral data and comparison with authentic reference, (B) mass spectral data and literature data or (C) mass data only.

**Table S14.** HPLC-ESI-MS/MS data of the XAD 7 extract of SC1, identified copigments and their absorption maxima  $\lambda_{\max}$ .

| Peak No. | Retention Time (min) | [M-H] <sup>-</sup> m/z | Fragments m/z | $\lambda_{\max}$ | Copigment                                        | Identification |
|----------|----------------------|------------------------|---------------|------------------|--------------------------------------------------|----------------|
| 1        | 11,6                 | 353                    | 191           | 323              | Neochlorogenic acid                              | A              |
| 2        | 15,9                 | 337                    | 163           | 310              | Coumaroylquinic acid                             | B              |
| 3        | 18,1                 | 353                    | 191           | 324              | Chlorogenic acid                                 | A              |
| 4        | 18,7                 | 353                    | 191           | 321              | Cryptochlorogenic acid                           | A              |
| 5        | 20,1                 | 577                    | 407           | 320              | Proanthocyanidin dimer                           | B              |
| 6        | 25,6                 | 771                    | 301           | 351              | Quercetin-3-(2 <sup>G</sup> -glucosylrutinoside) | B              |
| 7        | 27,4                 | 625                    | 301           | 308              | Quercetin-derivative                             | C              |
| 8        | 32,3                 | 609                    | 301           | 353              | Quercetin-3-rutinoside                           | A              |
| 9        | 36,4                 | 593                    | 285           | 347              | Kaempferol-3-rutinoside                          | B              |
| 10       | 37,3                 | 623                    | 315           | 351              | Isorhamnetin-rutinoside                          | B              |

Compounds were identified by (A) mass spectral data and comparison with authentic reference, (B) mass spectral data and literature data or (C) mass data only.

**Black Currant**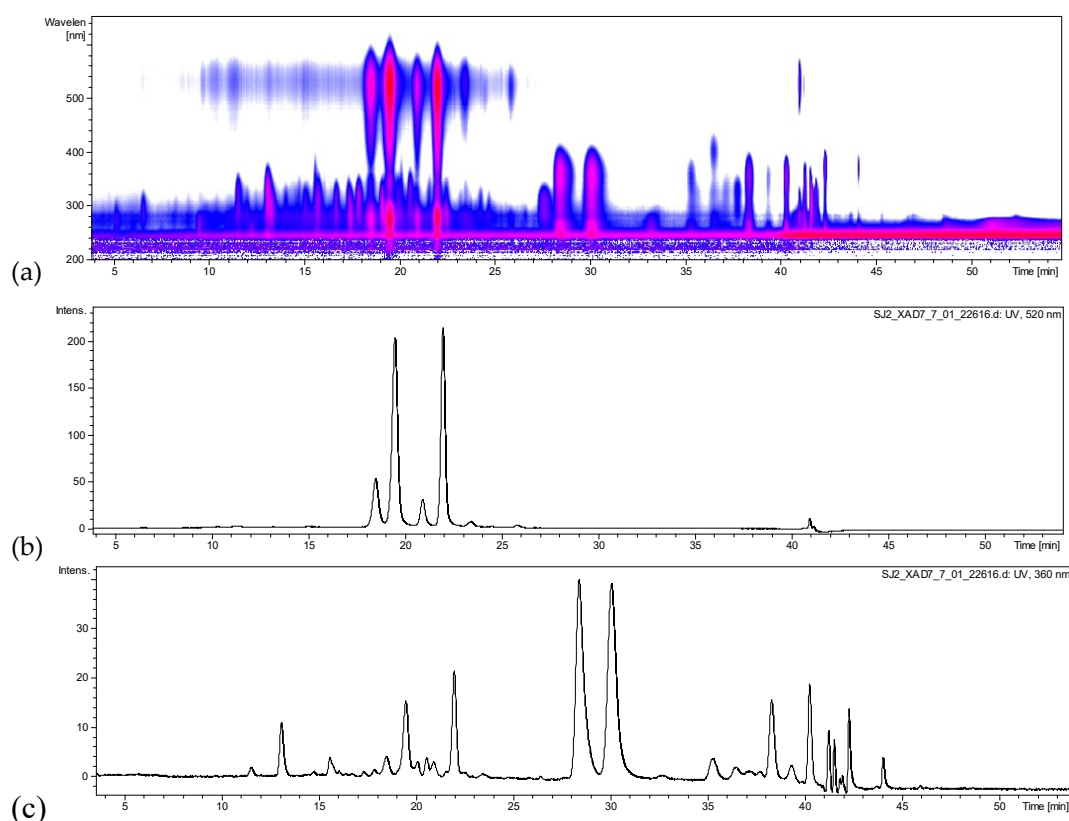

**Figure S8.** Isocontour plot from  $\lambda$  200 to 600 (a) and DAD chromatograms at a wavelength of  $\lambda$  520 (b) and  $\lambda$  360 (c) of the high-performance liquid chromatography electrospray ionization mass spectrometry (HPLC-ESI-MS/MS) chromatograms of the XAD 7 extract of BC2. Peak identification is given in Tables 15 and 16.

**Table S15.** HPLC-ESI-MS/MS data of the XAD 7 extract of BC2, identified anthocyanins and their absorption maxima  $\lambda_{\max}$ .

| Peak No. | Retention Time (min) | $[M+H]^+$ $m/z$ | Fragments $m/z$ | $\lambda_{\max}$ | Anthocyanin                          | Identification |
|----------|----------------------|-----------------|-----------------|------------------|--------------------------------------|----------------|
| 1        | 18,5                 | 465             | 303             | 523              | Delphinidin-3-glucoside              | A              |
| 2        | 19,5                 | 611             | 303             | 525              | Delphinidin-3-rutinoside             | B              |
| 3        | 20,9                 | 449             | 287             | 515              | Cyanidin-3-glucoside                 | A              |
| 4        | 22,0                 | 595             | 287             | 516              | Cyanidin-3-rutinoside                | B              |
| 5        | 23,5                 | 625             | 317             | 524              | Petunidin-3-(6''-coumaroyl)glucoside | B              |

Compounds were identified by (A) mass spectral data and comparison with authentic reference, (B) mass spectral data and literature data or (C) mass data only.

**Table S16.** HPLC-ESI-MS/MS data of the XAD 7 extract of BC2, identified copigments and their absorption maxima  $\lambda_{\max}$ .

| Peak No. | Retention time (min) | [M-H] <sup>-</sup> m/z | Fragments m/z | $\lambda_{\max}$ | Copigment               | Identification |
|----------|----------------------|------------------------|---------------|------------------|-------------------------|----------------|
| 1        | 13,2                 | 341                    | 179           | 319              | Caffeic acid hexoside   | B              |
| 2        | 15,7                 | 627                    | 301,475       | 306              | Quercetin-derivative    | C              |
| 3        | 18,1                 | 325                    | 145, 163      | 344              | Coumaric acid hexoside  | B              |
| 4        | 19,1                 | 463                    | 301           | 297              | Quercetin-hexoside      | B              |
| 5        | 20,6                 | 609                    | 301           | 326              | Quercetin-derivative    | C              |
| 6        | 28,4                 | 625                    | 317           | 355              | Isorhamnetin-rutinoside | B              |
| 7        | 30,0                 | 625                    | 317,179       | 355              | Isorhamnetin-derivative | C              |
| 8        | 38,4                 | 609                    | 301           | 352              | Quercetin-3-rutinoside  | A              |
| 9        | 40,1                 | 463                    | 301           | 352              | Quercetin-3-hexoside    | B              |
| 10       | 41,2                 | 609                    | 301           | 349              | Quercetin-derivative    | C              |
| 11       | 41,4                 | 593                    | 285           | 318              | Kaempferol-rutinoside   | B              |

Compounds were identified by (A) mass spectral data and comparison with authentic reference, (B) mass spectral data and literature data or (C) mass data only.

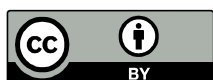

© 2020 by the authors. Licensee MDPI, Basel, Switzerland. This article is an open access article distributed under the terms and conditions of the Creative Commons Attribution (CC BY) license (<http://creativecommons.org/licenses/by/4.0/>).
